# Supplementary material for: Evaluation of biosynthesis parameters, stability and biological activities of silver nanoparticles synthesized by Cornus Officinalis extract under 365 nm UV radiation
Source: Royal Society of Chemistry journal article supplement (doi:10.1039/d0ra04482b), 2020-01-01

## Supporting Information for

### **Evaluation of Biosynthesis Parameters, Stability and Biological Activities for Silver Nanoparticles Synthesized by *Cornus Officinalis* Extract under 365 nm UV Radiation**

Yinghui Wang,<sup>‡a</sup> Simin Wei,<sup>‡\*b</sup> Kang Wang,<sup>a</sup> Zhe Wang,<sup>b</sup> Jinwei Duan,<sup>a</sup> Lin Cui,<sup>a</sup> Huayu Zheng,<sup>a</sup>

Ying Wang,<sup>a</sup> and Shanshan Wang<sup>a</sup>

(<sup>a</sup> College of Science, Chang'an University, Middle-section of Nan'er Huan Road, Xi'an, Shaanxi Province,  
710064, China)

(<sup>b</sup> Shaanxi Collaborative Innovation Center of Chinese Medicine Resources Industrialization, State Key  
Laboratory of Research & Development of Characteristic Qin Medicine Resources/Shaanxi Innovative Drug  
Research Center, Shaanxi University of Chinese Medicine, Shiji Ave., Xi'an-Xianyang New Ecomic Zone, Shaanxi  
Province, 712046, China)

(<sup>‡</sup> These authors contributed equally)

(E-mail addresses of corresponding authors: weisimin@iccas.ac.cn)

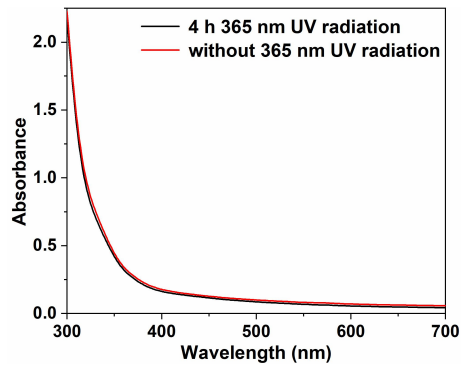

**Figure S1** The UV-Vis spectra of *Cornus Officinalis* Extract before and after 4 h 365 UV radiation

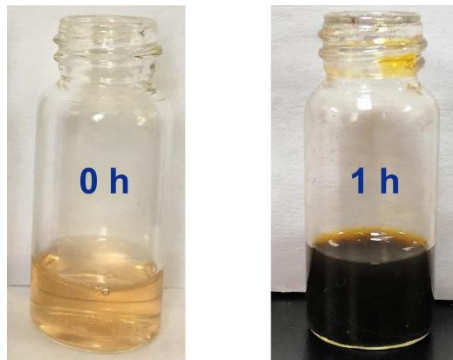

**Figure S2** The photograph of the mixture of *Cornus officinalis* aqueous extract and  $\text{AgNO}_3$  after the 365 nm UV radiation 0 h and 1 h

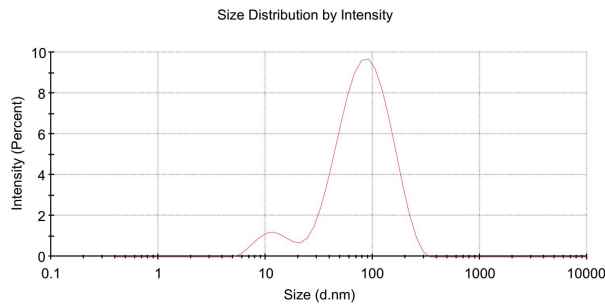

**Figure S3** The size of synthesized AgNPs after 30 days

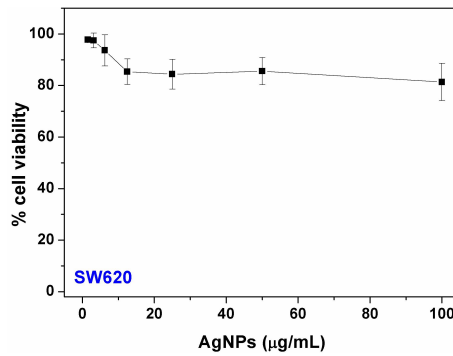

**Figure S4** Inhibition effects of biosynthesized AgNPs against SW620 cell line

**Table S1 The average size for synthesized AgNPs at different pH**

| pH        | 3.0       | 4.0       | 5.0       | 6.0      | 7.0      |
|-----------|-----------|-----------|-----------|----------|----------|
| Size (nm) | 116.9±1.7 | 109.3±1.7 | 100.2±1.3 | 82.6±1.3 | 67.5±0.7 |

**Table S2 The average size for synthesized AgNPs at different material proportion**

| ratio     | 1:1      | 1:2       | 1:3       | 1:5       | 1:10     |
|-----------|----------|-----------|-----------|-----------|----------|
| Size (nm) | 67.5±0.7 | 108.3±0.8 | 112.4±1.8 | 110.7±1.7 | 82.3±1.9 |

**Table S3 The average size for synthesized AgNPs at different reaction times**

| Times     | 0.2 h    | 0.5 h    | 1 h      | 2 h      | 3 h      | 4 h      | 5 h      |
|-----------|----------|----------|----------|----------|----------|----------|----------|
| Size (nm) | 66.5±0.9 | 68.9±0.7 | 67.5±0.7 | 67.9±0.4 | 67.4±0.8 | 66.3±0.3 | 64.2±0.8 |

**Table S4 Potential bioactive components in *Cornus Officinalis* Extract (top 10)**

| Compound                             | MW(g/mol)           | LC/MS Chromatogram                                                                    |
|--------------------------------------|---------------------|---------------------------------------------------------------------------------------|
| Loganin +HCOOH                       | 435.1408 - 435.1608 | 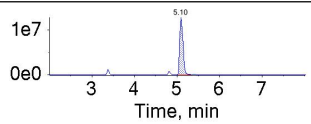   |
| Quinic acid                          | 191.0461 - 191.0661 |   |
| 8-O-Acetylharpagide +NH <sub>3</sub> | 424.1713 - 424.1913 |  |
| Cantharidin                          | 197.0708 - 197.0908 |  |
| Malic acid                           | 133.0043 - 133.0243 |  |
| Genipin                              | 227.0814 - 227.1014 |  |
| Geniposide                           | 389.1342 - 389.1542 |  |
| Asiatic acid                         | 487.3329 - 487.3529 |  |
| 2-Methoxycinnamic acid               | 179.0603 - 179.0803 |  |

---

5-Hydroxymethylfurfural      127.0290 - 127.0490

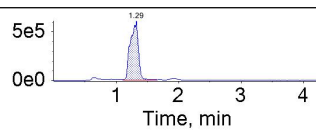

Triptonide      359.1389 - 359.1589

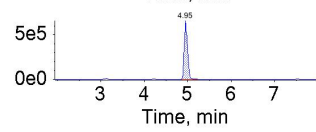

Supplement: d0ra04482b1.pdf [file d0ra04482b1.pdf]
